# Supplementary material
Source: Springer Nature journal article supplement (https://www.springermedizin.de/resource/supplementary/12943_2013_1505_MOESM14_ESM.pdf/9552280)

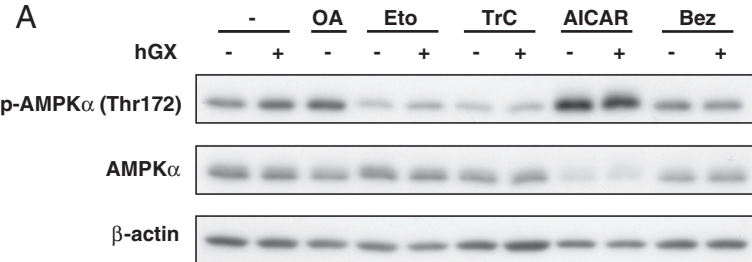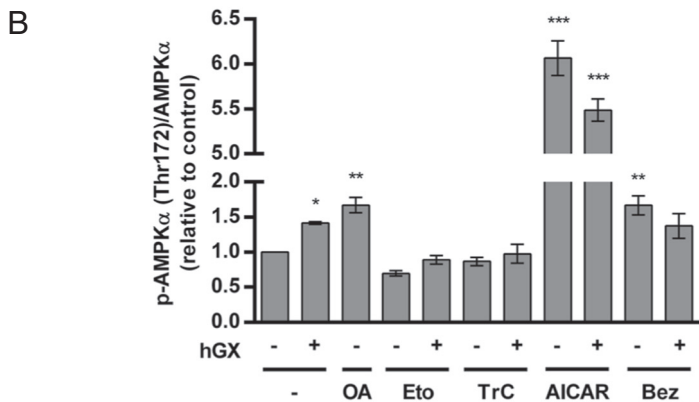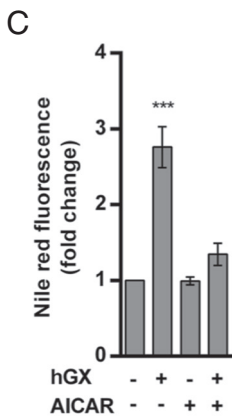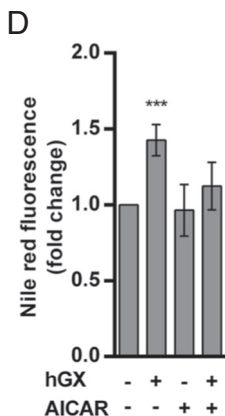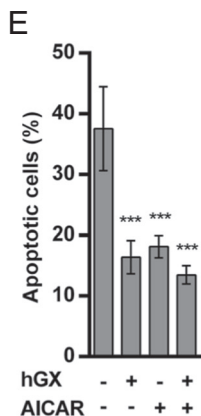

Supplement: MOESM14 [file 9552280]
